# Supplementary material for: Acid-Assisted Ball Mill Synthesis of Carboxyl-Functional-Group-Modified Prussian Blue as Sodium-Ion Battery Cathode
Source: MDPI journal article supplement (doi:10.3390/nano12081290), 2022-04-11
Supplement: s1 [file nanomaterials-1664862-supplementary.pdf › nanomaterials-1664862-supplementary.pdf]

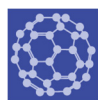

## Supplementary Materials

# Acid-Assisted Ball Mill Synthesis of Carboxyl-Functional-Group-Modified Prussian Blue as Sodium-Ion Battery Cathode

Yu Luo, Jiayu Peng, Shengming Yin \*, Lihong Xue \* and Youwei Yan \*

State Key Laboratory of Material Processing and Die & Mould Technology,  
School of Materials Science and Engineering, Huazhong University of Science and Technology, Wuhan,  
430074, China; luoyu@hust.edu.cn (Y.L.); d201980327@hust.edu.cn (J.P.)

\* Correspondence: yinsm@hust.edu.cn (S.Y.); xuelh@hust.edu.cn (L.X.); yanyw@hust.edu.cn (Y.Y.)

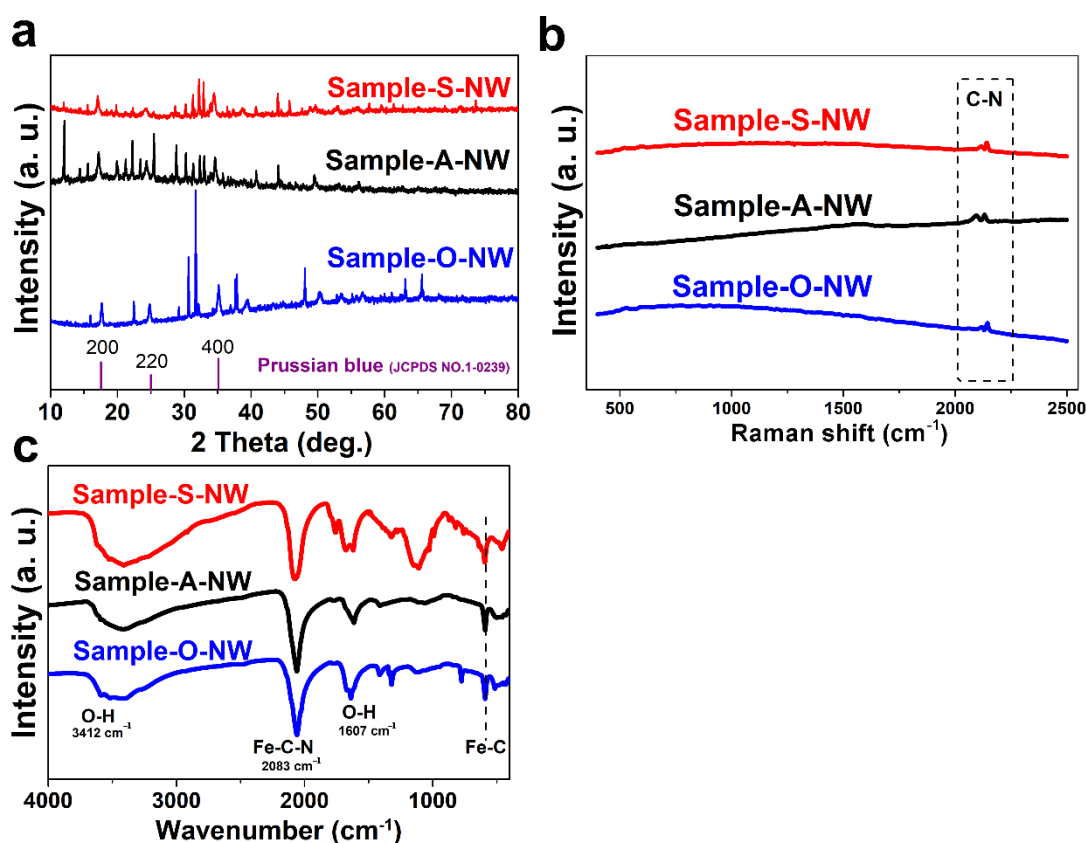

**Figure S1.** Characterization: (a)XRD pattern. (b)Raman spectrum result. (c) Fourier transform infrared spectroscopy result.

## Sample-S

| Quantify By Components |         |           |      |                  |           |                |           |
|------------------------|---------|-----------|------|------------------|-----------|----------------|-----------|
| Component              | BE [eV] | FWHM [eV] | RSF  | Atomic conc. [%] | Error [%] | Mass conc. [%] | Error [%] |
| Fe 2p                  | 708.79  | 0.00      | 2.96 | 8.1              | 0.50      | 26.4           | 1.29      |
| O 1s                   | 533.04  | 0.00      | 0.78 | 17.6             | 0.65      | 16.3           | 0.64      |
| C 1s                   | 285.04  | 0.00      | 0.28 | 65.6             | 0.79      | 45.8           | 1.02      |

## Sample-A

| Quantify By Components |         |           |      |                  |           |                |           |
|------------------------|---------|-----------|------|------------------|-----------|----------------|-----------|
| Component              | BE [eV] | FWHM [eV] | RSF  | Atomic conc. [%] | Error [%] | Mass conc. [%] | Error [%] |
| Fe 2p                  | 708.64  | 0.00      | 2.96 | 4.2              | 0.42      | 15.5           | 1.37      |
| O 1s                   | 532.69  | 0.00      | 0.78 | 18.6             | 0.54      | 19.6           | 0.63      |
| C 1s                   | 285.04  | 0.00      | 0.28 | 72.0             | 0.65      | 57.0           | 1.09      |

## Sample-O

| Quantify By Components |         |           |      |                  |           |                |           |
|------------------------|---------|-----------|------|------------------|-----------|----------------|-----------|
| Component              | BE [eV] | FWHM [eV] | RSF  | Atomic conc. [%] | Error [%] | Mass conc. [%] | Error [%] |
| O 1s                   | 533.66  | 0.00      | 0.78 | 16.4             | 0.50      | 17.3           | 0.56      |
| C 1s                   | 285.06  | 0.00      | 0.28 | 74.7             | 0.59      | 59.1           | 0.99      |
| Fe 2p                  | 708.71  | 0.00      | 2.96 | 4.6              | 0.37      | 17.1           | 1.19      |

Figure S2. EDS results of three samples

Table S1. Atomic concentrations of each element derived from EDS results.

|          | Fe<br>(atomic conc) | O<br>(atomic conc) | C<br>(atomic conc) | Fe/C<br>(factor x) | O/C<br>(factor y) |
|----------|---------------------|--------------------|--------------------|--------------------|-------------------|
| Sample-S | 8.1                 | 17.6               | 65.5               | 0.124              | 0.268             |
| Sample-A | 4.2                 | 18.6               | 72                 | 0.058              | 0.258             |
| Sample-O | 4.6                 | 16.4               | 74.7               | 0.062              | 0.22              |

Factor x set as the ratio Fe/C, as Fe atom content come from Prussian blue, C atom content come from Prussian blue and carboxyl function group, the decrease of the factor x exhibit that more C atom on the surface of the Prussian blue.

Factor y set as the ratio O/C, as C atom content come from Prussian blue and carboxyl function group, O atom content come from carboxyl function group and interstitial water.

We set Prussian blue content to 1 mol, and set carboxyl function group content to  $\alpha$  mol, set interstitial water content (the defect) to  $\beta$  mol.

As the carboxyl function group (O element content/C element content = 2/1), get the formula:  $y = (\beta + 2\alpha)/(1 + \alpha)$

then,  $\beta = y + (y - 2)\alpha$ ,

as  $y < 1$ ,  $\alpha \geq 0$ , we get the conclusion that  $\beta_{\text{sample-O}} < \beta_{\text{sample-A}} < \beta_{\text{sample-S}}$ .

The result reveal that the decrease of the factor y mean less interstitial water on the surface of the Prussian blue

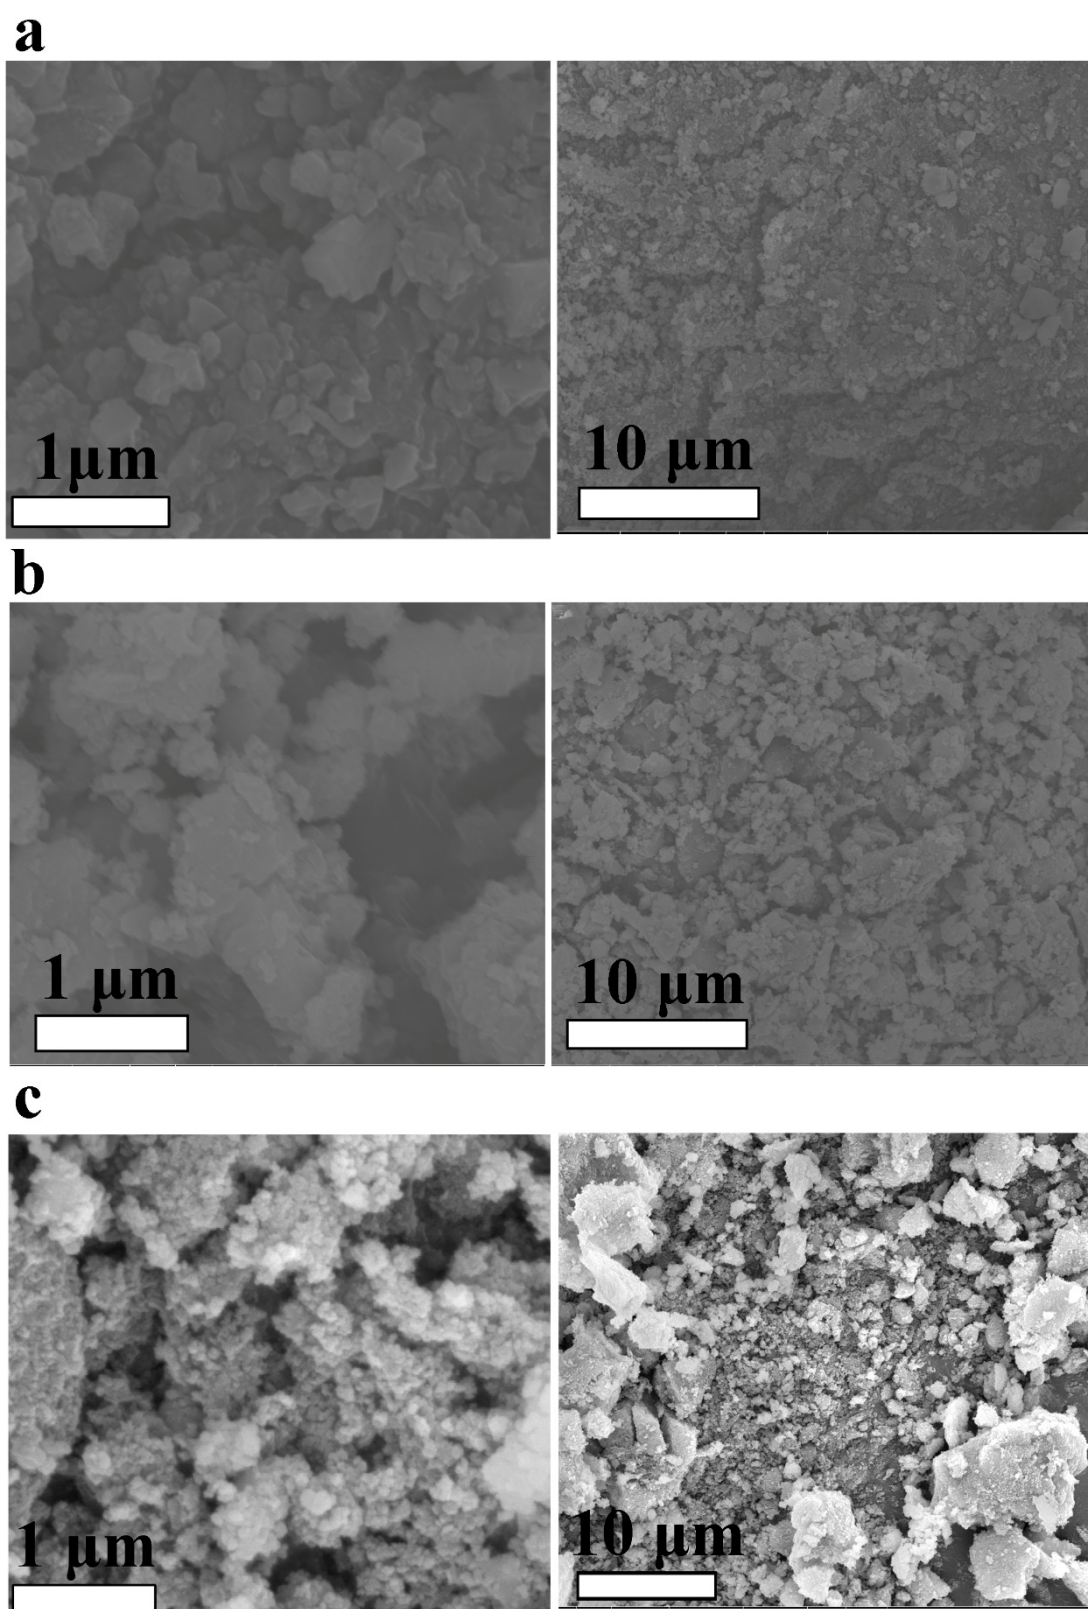

**Figure S3.** SEM images of three samples. (a) The Sample-S. (b) The Sample-A. (c) The Sample-O.

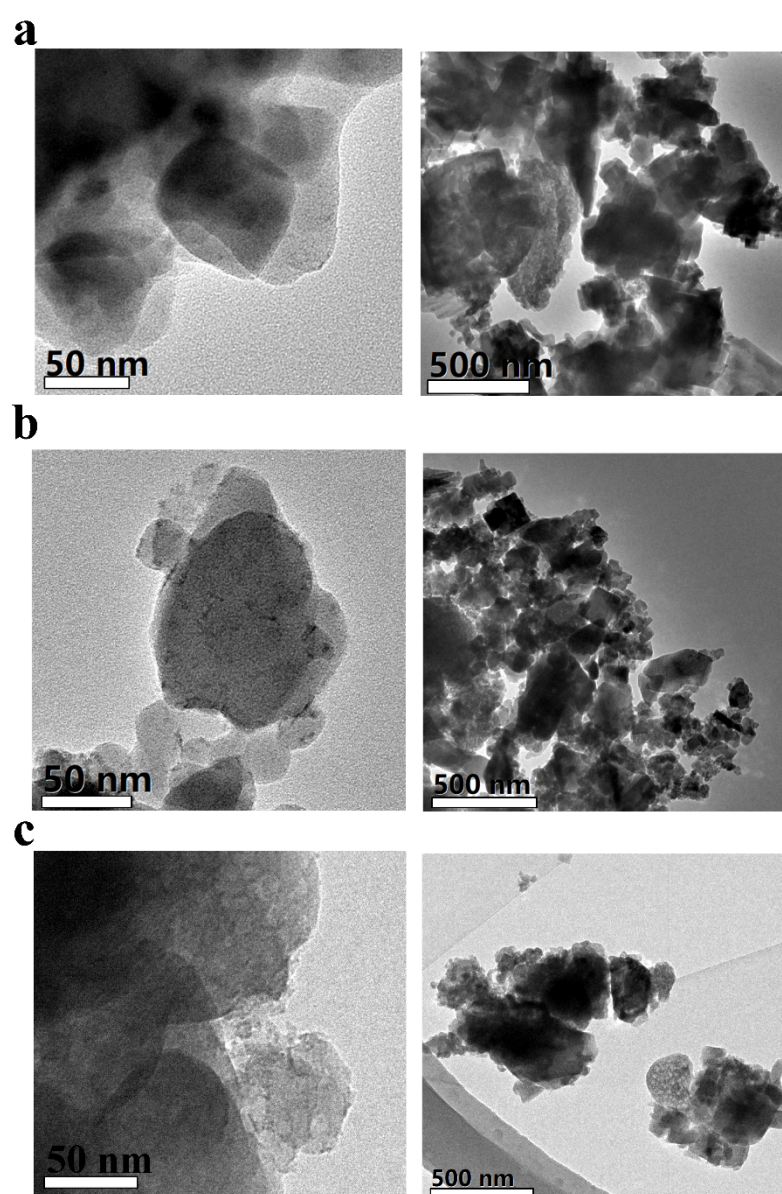

**Figure S4.** TEM image of three samples. (a) The Sample-S. (b) The Sample-A. (c) The Sample-O.



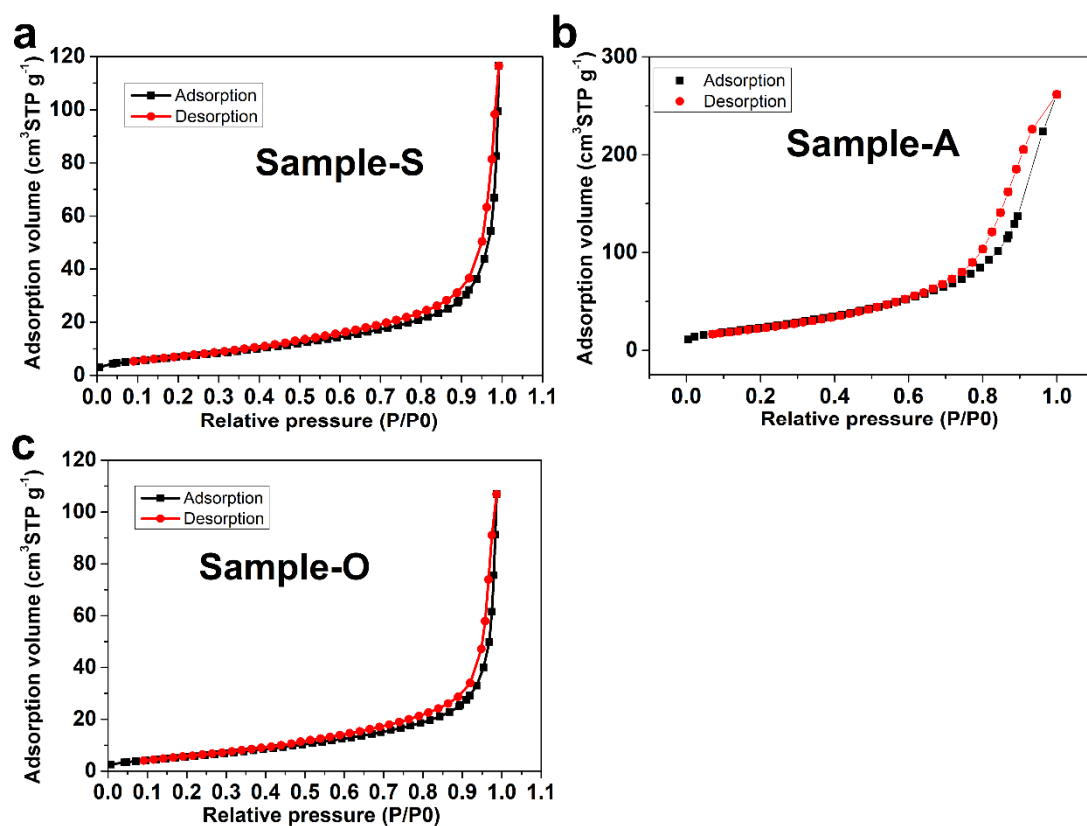

**Figure S5.** The adsorption/desorption nitrogen isotherms of three samples. (a) The Sample-S. (b) The Sample-A. (c) The Sample-O.

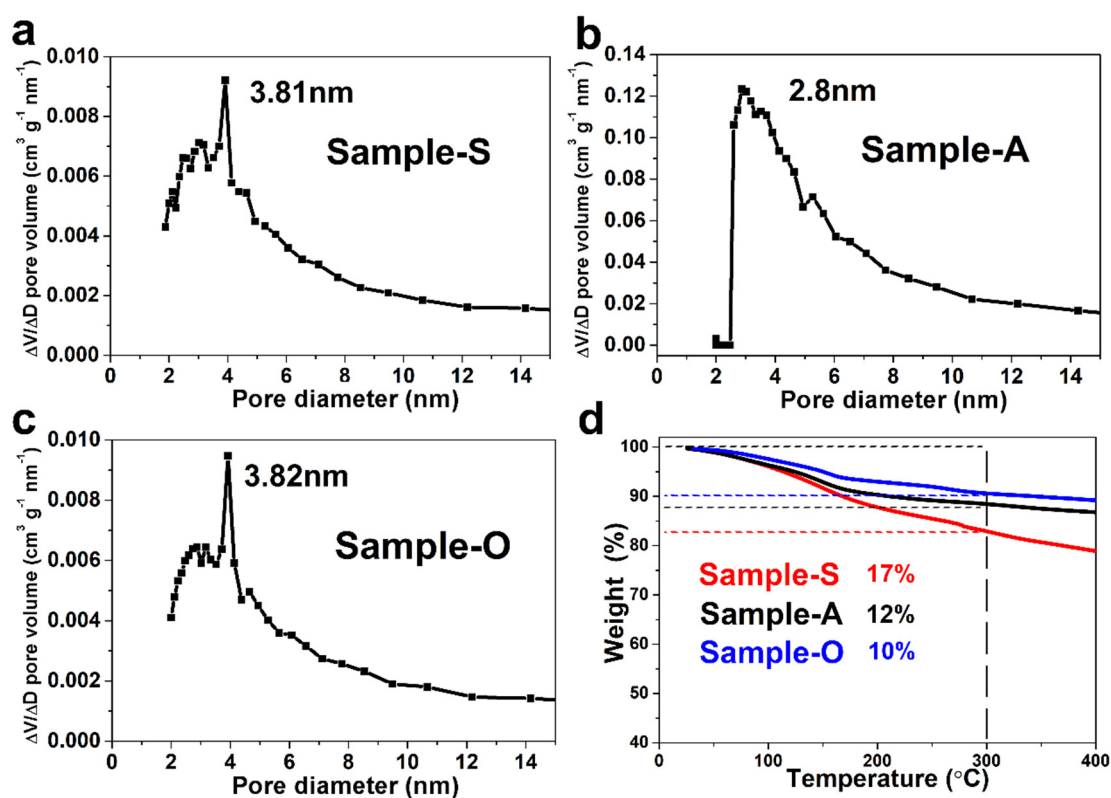

**Figure S6.** BJH pore size distribution plots and TGA curves. (a) The Sample-S. (b) The Sample-A. (c) The Sample-O. (d) Temperature.

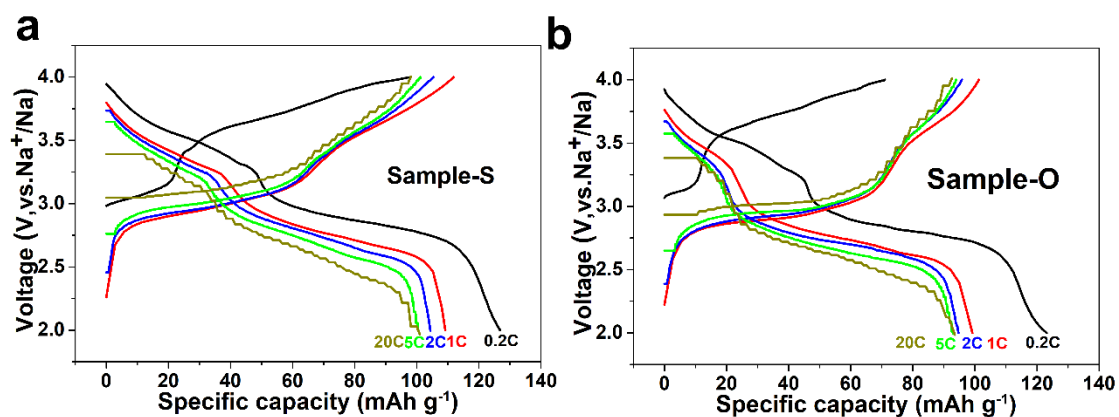

Figure S7. Charge and discharge curve of the Sample-O (a) and the Sample-S (b) at various currents.

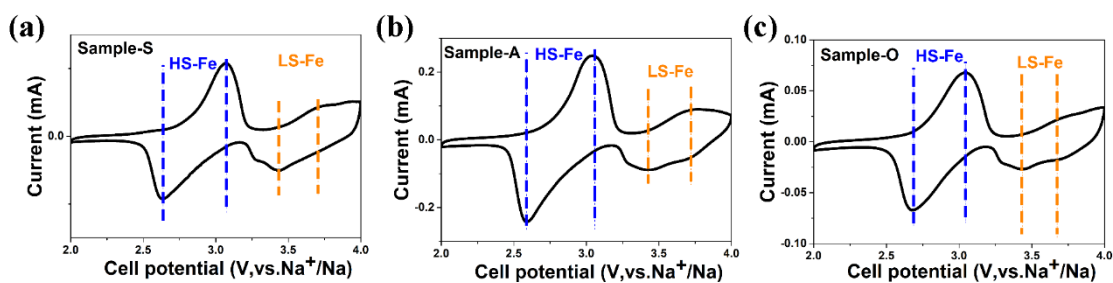

Figure S8. CV curve of all the samples (range from 2.0V to 4.0V). (a) The Sample-S. (b) The Sample-A. (c) The Sample-O.

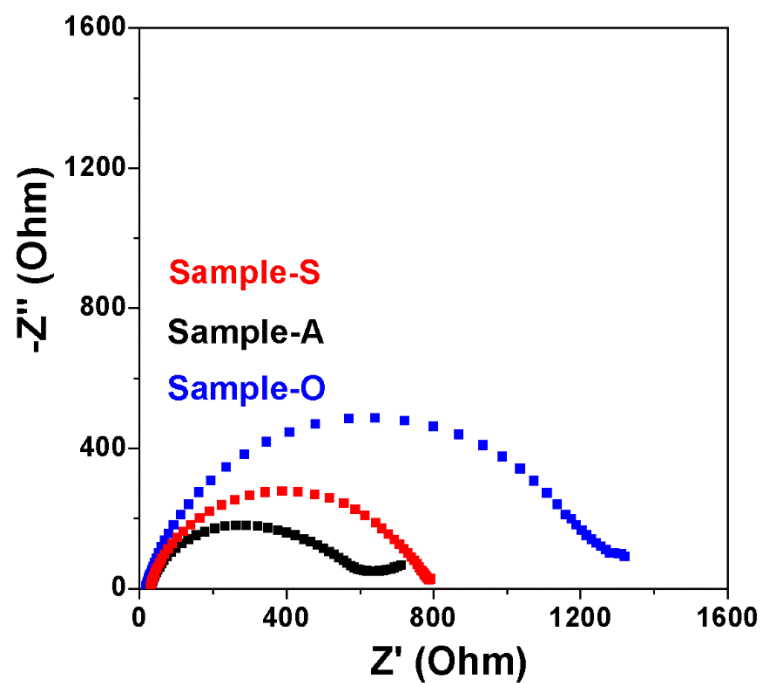

Figure S9. Electrochemical impedance test result.

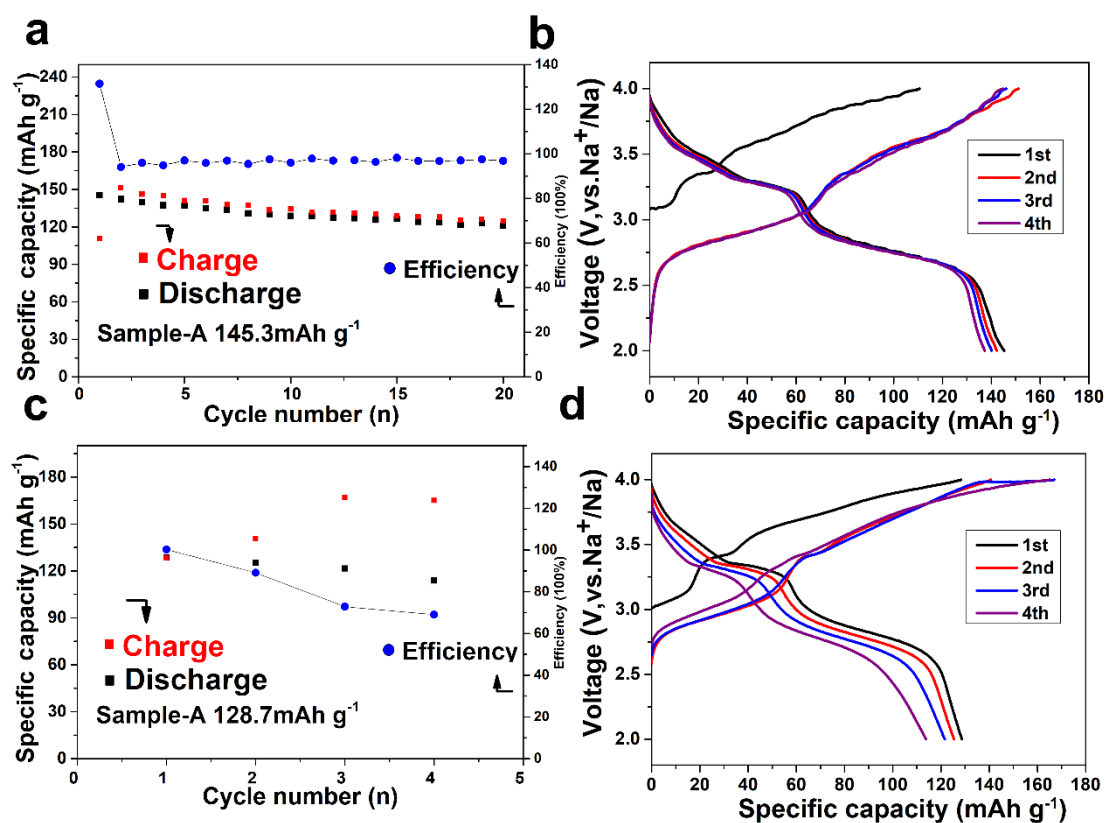

Figure S10. Electrochemical performance: (a) and (b) Liquid state half cell electrochemical performance at 0.2 C, 1 C=170 mA g<sup>-1</sup>. (c) and (d) Solid state half cell electrochemical performance at 0.2 C, 1 C=170 mA g<sup>-1</sup>.

Table S2. Literature Comparison.

| Synthesis method      | Synthetic hazard level                                                 | Raw materials                                                                                                          | Additive                                             | Liquid state sodium ion battery               |                                                  | Solid state sodium ion battery | Year | [Ref. 1] |
|-----------------------|------------------------------------------------------------------------|------------------------------------------------------------------------------------------------------------------------|------------------------------------------------------|-----------------------------------------------|--------------------------------------------------|--------------------------------|------|----------|
|                       |                                                                        |                                                                                                                        |                                                      | cycle performance<br>current@cycle @retention | rate performance                                 | electrochemical performance    |      |          |
| Co-precipitation      | Moderate                                                               | Double Fe-ion source: FeSO <sub>4</sub> ·7H <sub>2</sub> O and Na <sub>4</sub> Fe(CN) <sub>6</sub> ·10H <sub>2</sub> O | Sodium citrate, NaCl                                 | 5C@3700@79%                                   | 140mAh/g at 0.2C, 130mAh/g at 1C, 105mAh/g at 5C | /                              | 2020 | [40]     |
| Hydrothermal reaction | Danger (H <sub>2</sub> SO <sub>4</sub> made Prussian blue produce HCN) | Single Fe-ion source: Na <sub>4</sub> Fe(CN) <sub>6</sub> ·10H <sub>2</sub> O                                          | Polyvinylpyrrolidone, H <sub>2</sub> SO <sub>4</sub> | 800mA/g@4.00 @80%                             | 113mAh/g at 1600mA/g, 139mAh/g at 50 mA/g        | /                              | 2020 | [41]     |
| Co-precipitation      | Moderate                                                               | Double Fe-ion source: Na <sub>4</sub> Fe(CN) <sub>6</sub> ·10H <sub>2</sub> O and MnSO <sub>4</sub> ·H <sub>2</sub> O  | NaCl                                                 | 1C@500@91.8 %                                 | 142.7mAh/g at 0.1C, 89.7mAh/g at 20C             | /                              | 2018 | [42]     |

|                  |                                                |                                                                                                                                          |                                                                               |                   |                                                                  |                              |           |      |
|------------------|------------------------------------------------|------------------------------------------------------------------------------------------------------------------------------------------|-------------------------------------------------------------------------------|-------------------|------------------------------------------------------------------|------------------------------|-----------|------|
| Co-precipitation | Danger<br>(HCl made Prussian blue produce HCN) | Single Fe-ion source: $\text{Na}_4\text{Fe}(\text{CN})_6 \bullet 10 \text{H}_2\text{O}$                                                  | HCl                                                                           | 0.05A/g@100@84.5% | 51.1 mAh/g at 0.4 A/g<br>49.7 mAh/g at 1 A/g                     | /                            | 2014      | [43] |
| Co-precipitation | Danger                                         | Single Fe-ion source: $\text{Na}_4\text{Fe}(\text{CN})_6 \bullet 10 \text{H}_2\text{O}$                                                  | PVP, Ascorbic acid, Sodium dodecyl benzene sulfonate, Acetone and Acetic acid | 100mA/g@100@70%   | 103 mAh/g at 25 mA/g<br>80 mAh/g at 400 mA/g                     | /                            | 2019      | [34] |
| Co-precipitation | Danger<br>(HCl made Prussian blue produce HCN) | Single Fe-ion source: $\text{Na}_4\text{Fe}(\text{CN})_6 \bullet 10 \text{H}_2\text{O}$                                                  | /                                                                             | 25mA/g@150@97%    | 160mAh/g at 25mA/g<br>110mAh/g at 150 mA/g<br>70mAh/g at 600mA/g | /                            | 2014      | [44] |
| Co-precipitation | Moderate                                       | Double Fe-ion source: $\text{FeSO}_4 \cdot 7\text{H}_2\text{O}$ and $\text{Na}_4\text{Fe}(\text{CN})_6 \bullet 10 \text{H}_2\text{O}$    | Sodium citrate                                                                | 100mA/g@500@71%   | 116mAh/g at 10mA/g<br>70mAh/g at 2000mA/g                        | /                            | 2020      | [32] |
| Co-precipitation | Danger<br>(HCl made Prussian blue produce HCN) | Single Fe-ion source: $\text{Na}_4\text{Fe}(\text{CN})_6 \bullet 10 \text{H}_2\text{O}$                                                  | HCl, NaCl                                                                     | 20mA/g@400@97%    | 103.6mAh/g at 20mA/g,<br>90mAh/g at 100mA/g                      | /                            | 2015      | [46] |
| Co-precipitation | Danger<br>(HCl made Prussian blue produce HCN) | Single Fe-ion source: $\text{Na}_4\text{Fe}(\text{CN})_6 \bullet 10 \text{H}_2\text{O}$                                                  | HCl, Ascorbic acid                                                            | 25mA/g@200@90%    | 150mAh/g at 25mA/g                                               | /                            | 2015      | [10] |
| Co-precipitation | Moderate                                       | Double Fe-ion source: $\text{FeCl}_2 \bullet 4 \text{H}_2\text{O}$ and $\text{Na}_4\text{Fe}(\text{CN})_6 \bullet 10 \text{H}_2\text{O}$ | /                                                                             | 200mA/g@100@70.5% | 129mAh/g at 200mA/g,<br>71.2mAh/g at 1200mA/g                    | /                            | 2015      | [47] |
| Co-precipitation | Moderate                                       | Double Fe-ion source: $\text{FeCl}_2 \bullet 4 \text{H}_2\text{O}$ and $\text{Na}_4\text{Fe}(\text{CN})_6 \bullet 10 \text{H}_2\text{O}$ | NaCl                                                                          | 1C@200@73%        | 123 mAh/g at 100mA/g, 78m Ah/g at 8C                             | /                            | 2016      | [48] |
| Ball mill        | Moderate                                       | Double Fe-ion source: Ferrous acetate and                                                                                                | Ascorbic acid                                                                 | 1C@450@65%        | 145.3mAh/g at 0.2C<br>113.3mAh/g at 1C                           | Fe-Fe PB: 128.7mAh/g at 0.2C | This work | /    |



|                  |                                             |                                                                                                                                  |                |                   |                                             |                                   |      |      |
|------------------|---------------------------------------------|----------------------------------------------------------------------------------------------------------------------------------|----------------|-------------------|---------------------------------------------|-----------------------------------|------|------|
|                  |                                             | $\text{Na}_4\text{Fe}(\text{CN})_6 \cdot 10\text{H}_2\text{O}$                                                                   |                |                   | 95.3mAh/g at 20C<br>(1C=170mA/g)            |                                   |      |      |
| Co-precipitation | Moderate                                    | Double ion source:<br>$\text{Ni}(\text{CH}_3\text{COO})_2$ and<br>$\text{Na}_4\text{Fe}(\text{CN})_6 \cdot 10\text{H}_2\text{O}$ | Sodium citrate | 0.1A/g@1120@85.5% | 73.8mAh/g at 0.05A/g<br>54.5mAh/g at 0.5A/g | Ni-Fe PB:<br>73.8mAh/g at 0.05A/g | 2020 | [35] |
| Co-precipitation | Danger (HCl made Prussian blue produce HCN) | Single Fe-ion source:<br>$\text{Na}_4\text{Fe}(\text{CN})_6 \cdot 10\text{H}_2\text{O}$                                          | HCl            | /                 | 70 mAh/g at 6C                              | Fe-Fe PB:<br>87.5mAh/g at 8C      | 2020 | [45] |
